# Supplementary material for: Subclinical Inflammatory Status in Rett Syndrome
Source: Hindawi journal article supplement (doi:10.1155/2014/480980), 2014-01-01
Supplement: f1 [file 480980.f1.pdf]

**Supplementary Table 1:** Details for differentially expressed plasma proteins in Rett Syndrome and controls.

| Protein |       | MECP2 gene mutation type |           |         |           |           |         |           |         |         |           |         |         |         |                                 |         |         |         |         |
|---------|-------|--------------------------|-----------|---------|-----------|-----------|---------|-----------|---------|---------|-----------|---------|---------|---------|---------------------------------|---------|---------|---------|---------|
| ID      | Name  | Control A                | RTT       |         | Control B | R306C     |         | T158M     |         |         | R168X     |         |         |         | Large deletions (exons 3 and 4) |         |         |         |         |
|         |       | mean±SD                  | mean±SD   | Trend A | mean±SD   | mean±SD   | Trend B | mean±SD   | Trend B | Trend C | mean±SD   | Trend B | Trend C | Trend D | mean±SD                         | Trend B | Trend C | Trend D | Trend E |
| 1       | CFBA  | 0.93±0.65                | 1.46±0.63 | ↑*      | 0.83±0.11 | 0.94±0.17 |         | 1.84±0.73 | ↑*      | ↑*      | 0.99±0.27 |         |         | ↓*      | 2.09±0.37                       | ↑*      | ↑*      |         | ↑*      |
| 2       | TRFE  | 4.06±0.62                | 3.57±0.85 |         | 4.02±0.53 | 3.92±0.83 |         | 4.13±1.22 |         |         | 2.14±0.41 | ↓*      | ↓*      | ↓*      | 4.10±0.92                       |         |         |         | ↑*      |
| 3       | ALBU  | 3.09±1.89                | 5.16±1.09 | ↑*      | 3.19±0.44 | 3.35±0.51 |         | 5.81±0.21 | ↑**     | ↑**     | 5.60±0.21 | ↑**     | ↑**     |         | 5.88±0.42                       | ↑**     | ↑**     |         |         |
| 4       | FETUA | 1.45±0.82                | 2.54±0.62 | ↑**     | 1.42±0.69 | 2.19±1.13 |         | 2.10±0.77 |         |         | 2.77±0.48 | ↑*      |         |         | 3.11±0.55                       | ↑**     | ↑*      | ↑*      |         |
| 5       | A1AT  | 2.66±0.83                | 5.25±1.70 | ↑**     | 1.37±0.68 | 3.89±0.51 | ↑*      | 6.61±1.32 | ↑**     | ↑*      | 3.74±0.53 | ↑*      |         | ↓*      | 6.76±1.46                       | ↑**     | ↑*      |         | ↑*      |
| 6       | FIBG  | 1.28±0.50                | 1.00±0.43 |         | 1.31±0.56 | 1.38±0.45 |         | 1.25±0.31 |         |         | 0.72±0.16 | ↓*      | ↓*      | ↓*      | 0.68±0.11                       | ↓*      | ↓*      | ↓*      |         |
| 7       | ALBU  | 4.85±2.01                | 7.08±1.93 | ↑*      | 4.17±0.32 | 7.59±1.16 | ↑*      | 4.31±0.41 |         | ↓*      | 8.18±1.45 | ↑**     | ↑*      |         | 8.23±1.55                       | ↑**     | ↑*      | ↑**     |         |
| 8       | HPT   | 5.59±1.36                | 6.52±1.21 | ↑*      | 6.06±0.98 | 5.86±0.81 |         | 6.13±1.05 |         |         | 6.01±0.79 |         |         |         | 8.08±1.09                       | ↑*      | ↑*      | ↑*      | ↑*      |
| 9       | IGHG2 | 1.33±0.46                | 2.70±1.86 | ↑*      | 1.23±0.10 | 1.09±0.12 |         | 1.36±0.20 |         |         | 5.73±0.22 | ↑**     | ↑**     | ↑**     | 2.65±0.62                       | ↑*      | ↑*      | ↑*      | ↓*      |
| 10      | TTHY  | 0.95±0.60                | 1.82±0.89 | ↑*      | 0.99±0.14 | 0.97±0.12 |         | 1.03±0.16 |         |         | 1.86±0.31 | ↑*      | ↑*      | ↑*      | 3.19±0.44                       | ↑**     | ↑**     | ↑**     | ↑*      |
| 11      | ALBU  | 1.14±0.41                | 2.24±1.88 | ↑*      | 1.04±0.21 | 1.17±0.29 |         | 1.21±0.33 |         |         | 5.47±0.21 | ↑**     | ↑**     | ↑**     | 1.13±0.27                       |         |         |         | ↓**     |
| 12      | APOA1 | 4.78±2.22                | 3.18±1.28 | ↓*      | 5.40±0.26 | 5.24±0.77 |         | 2.48±0.45 | ↓*      | ↓*      | 2.38±0.35 | ↓**     | ↓**     |         | 2.63±0.57                       | ↓*      | ↓*      |         |         |
| 13      | RET4  | 6.40±1.45                | 2.58±1.95 | ↓**     | 6.59±0.65 | 6.84±1.59 |         | 1.88±0.37 | ↓*      | ↓*      | 1.39±0.29 | ↓**     | ↓**     |         | 1.21±0.31                       | ↓**     | ↓**     |         |         |
| 14      | ALBU  | 2.79±0.62                | 4.85±2.80 | ↑*      | 3.05±0.41 | 2.3±0.49  |         | 2.42±0.62 |         |         | 8.78±1.56 | ↑**     | ↑**     | ↑**     | 5.92±0.45                       | ↑*      | ↑*      | ↑*      |         |
| 15      | HPT   | 3.07±0.54                | 5.58±2.15 | ↑**     | 3.51±0.23 | 3.5±0.42  |         | 3.71±0.60 |         |         | 7.46±1.31 | ↑**     | ↑**     | ↑**     | 7.64±1.30                       | ↑**     | ↑**     | ↑**     |         |
| 16      | TTHY  | 6.59±1.29                | 5.08±2.19 | ↓*      | 8.03±1.24 | 7.87±1.31 |         | 3.21±0.58 | ↓**     | ↓**     | 3.18±0.69 | ↓*      | ↓*      |         | 6.04±1.46                       |         |         | ↑*      | ↑*      |
| 17      | SAA1  | 1.26±0.22                | 2.07±0.57 | ↑*      | 1.15±0.11 | 1.38±0.14 |         | 1.87±0.32 |         |         | 2.47±0.48 | ↑*      | ↑*      |         | 2.58±0.37                       | ↑*      | ↑*      |         |         |

↓ protein spot underexpressed; ↑ protein spot overexpressed; - protein spot disappearance; + protein spot appearance; N.D. not detectable. A1AT, Alpha-1-antitrypsin; AMBP, Alpha-1-microglobulin; ALBU, Albumin; CLUS, Clusterin; CO3, Complement C3; FIBB, Fibrinogen beta-chain; HBB, Hemoglobin subunit beta; HPT, Haptoglobin; IGHG2, Immunoglobulin gamma-2 chain C region; IGJ, Immunoglobulin J chain; TRFE, Serum transferrin; TTHY, Transthyretin. Numbers in the parentheses indicated the number of patients or subjects who are compared.
